# Supplementary material
Source: MDPI journal article supplement (https://www.mdpi.com/1999-4907/8/4/119)
Supplement: s1 [file s1]

**Supplementary Code S1**A VB program for estimating the basal area potential productivity using

A combined method of a golden section and a dichotomy iteration algorithmis shown here.

Function LargestProductive_G(GrowthBasalAreaEquation As String, VarArray1() As String, ParArray1() As String, VarArray2() As String, ParArray2() As String, BasalPar() As Variant, _

HPar() As Variant, GivenSiteIndex() As Variant, ForestandSiteType() As Variant, tt As Double, Dmin As Double, Dmax As Double, err0 As Double, _

G1Method As Long, Efmethod As Long, SP As Double, SdInfor() As Variant, AgeInfor() As Variant, BaseD As Double, Hname As String) As MATRIX()

On Error GoTo han2

Dim i As Long, count As Long, s1 As Double, s2 As Double, s3 As Double, s4 As Double, GI1 As Double, GI2 As Double, GI3 As Double, GI4 As Double, Data0() As Variant, GI() As Double, j As Long, ParArray1Vaue() As Double, ParArray2Vaue() As Double, NumAge As Long, n() As Double, d() As Double, h() As Double, ss() As Double, n2 As Double, D2 As Double, h2 As Double, SS2 As Double, n3 As Double, d3 As Double, H3 As Double, ss3 As Double, Ntable As Long, ii As Long, jj As Long, UpS As Double, LowS As Double, G02 As Double, G12 As Double, G03 As Double, G13 As Double, G0() As Double, G1() As Double, IterN As Long

NumAge = Val(AgeInfor(2)) - Val(AgeInfor(1)) + 1

ReDimGI(NumAge, 0)

ReDimData0(1, 2 + UBound(ForestandSiteType, 2))

Data0(0, 1) = Trim(GivenSiteIndex(0))

Data0(0, 2) = Trim(AgeInfor(0))

For i = 1 To UBound(ForestandSiteType, 2)

Data0(0, 2 + i) = Trim(ForestandSiteType(0, i))

Next i

ReDimn(NumAge, 0)

ReDimd(NumAge, 0)

ReDimh(NumAge, 0)

ReDimss(NumAge, 0)

Dim Lastss() As Double

ReDimLastss(NumAge, 0)

ReDimG0(NumAge, 0)

ReDimG1(NumAge, 0)

LowS = Val(SdInfor(1))

UpS = Val(SdInfor(2))

Ntable = 0

Dim NumberofGivenSiteindex As Long

If UBound(GivenSiteIndex) = 0 Then

NumberofGivenSiteindex = 1

Else

NumberofGivenSiteindex = UBound(GivenSiteIndex)

End If

For i = 1 To NumberofGivenSiteindex

For j = 1 To UBound(ForestandSiteType, 1)

Ntable = Ntable + 1

ReDim Preserve GI(NumAge, Ntable)

ReDim Preserve n(NumAge, Ntable)

ReDim Preserve d(NumAge, Ntable)

ReDim Preserve h(NumAge, Ntable)

ReDim Preserve ss(NumAge, Ntable)

ReDim Preserve Lastss(NumAge, Ntable)

ReDim Preserve G0(NumAge, Ntable)

ReDim Preserve G1(NumAge, Ntable)

For ii = 1 To NumAge

If UBound(GivenSiteIndex) = 0 Then

Data0(1, 1) = ""

Else

Data0(1, 1) = GivenSiteIndex(i)

End If

Data0(1, 2) = Val(AgeInfor(1)) + ii - 1

For jj = 1 To UBound(ForestandSiteType, 2)

Data0(1, 2 + jj) = Trim(ForestandSiteType(j, jj))

Next jj

ParArray1Vaue = GetUnitPara(Data0, ParArray1, BasalPar)

ParArray2Vaue = GetUnitPara(Data0, ParArray2, HPar)

GI1 = 0

GI2 = 0

GI3 = 0

GI4 = 0

count = 0

s1 = LowS

s2 = LowS + 0.382 * (UpS - LowS)

s3 = LowS + 0.618 * (UpS - LowS)

s4 = UpS

GI2 = GIncrement(Data0(), GrowthBasalAreaEquation, VarArray1(), ParArray1(), ParArray1Vaue(), VarArray2(), ParArray2Vaue(), s2, tt, BaseD, SdInfor, Hname, _

Dmin, Dmax, err0, G1Method, Efmethod, SP, n2, D2, h2, SS2, G02, G12)

If GI2 = -1 And G12 = 0 Then

GI(ii, Ntable) = 0

G0(ii, Ntable) = 0

G1(ii, Ntable) = 0

n(ii, Ntable) = 0

d(ii, Ntable) = 0

h(ii, Ntable) = 0

ss(ii, Ntable) = 0

Lastss(ii, Ntable) = 0

GoToaaa

End If

GI3 = GIncrement(Data0(), GrowthBasalAreaEquation, VarArray1(), ParArray1(), ParArray1Vaue(), VarArray2(), ParArray2Vaue(), s3, tt, BaseD, SdInfor, Hname, _

Dmin, Dmax, err0, G1Method, Efmethod, SP, n3, d3, H3, ss3, G03, G13)

If GI3 = -1 And G13 = 0 Then

GI(ii, Ntable) = 0

G0(ii, Ntable) = 0

G1(ii, Ntable) = 0

n(ii, Ntable) = 0

d(ii, Ntable) = 0

h(ii, Ntable) = 0

ss(ii, Ntable) = 0

Lastss(ii, Ntable) = 0

GoToaaa

End If

IterN = 0

Do While Abs(GI2 - GI3) > err0

IterN = IterN + 1

GI2 = GIncrement(Data0(), GrowthBasalAreaEquation, VarArray1(), ParArray1(), ParArray1Vaue(), VarArray2(), ParArray2Vaue(), s2, tt, BaseD, SdInfor, Hname, _

Dmin, Dmax, err0, G1Method, Efmethod, SP, n2, D2, h2, SS2, G02, G12)

If GI2 = -1 And G12 = 0 Then

GI(ii, Ntable) = 0

G0(ii, Ntable) = 0

G1(ii, Ntable) = 0

n(ii, Ntable) = 0

d(ii, Ntable) = 0

h(ii, Ntable) = 0

ss(ii, Ntable) = 0

Lastss(ii, Ntable) = 0

GoToaaa

End If

GI3 = GIncrement(Data0(), GrowthBasalAreaEquation, VarArray1(), ParArray1(), ParArray1Vaue(), VarArray2(), ParArray2Vaue(), s3, tt, BaseD, SdInfor, Hname, _

Dmin, Dmax, err0, G1Method, Efmethod, SP, n3, d3, H3, ss3, G03, G13)

If GI3 = -1 And G13 = 0 Then

GI(ii, Ntable) = 0

G0(ii, Ntable) = 0

G1(ii, Ntable) = 0

n(ii, Ntable) = 0

d(ii, Ntable) = 0

h(ii, Ntable) = 0

ss(ii, Ntable) = 0

Lastss(ii, Ntable) = 0

GoToaaa

End If

If GI2 > GI3 And Abs(GI2 - GI3) > err0 Then

s1 = s1

s4 = s3

s2 = s1 + 0.382 * (s4 - s1)

s3 = s1 + 0.618 * (s4 - s1)

GI1 = GI1

GI4 = GI3

ElseIf GI2 < GI3 And Abs(GI2 - GI3) > err0 Then

s1 = s2

s4 = s4

s2 = s1 + 0.382 * (s4 - s1)

s3 = s1 + 0.618 * (s4 - s1)

GI1 = GI2

GI4 = GI4

End If

Loop

GI(ii, Ntable) = (GI2 + GI3) / 2

G0(ii, Ntable) = (G02 + G03) / 2

G1(ii, Ntable) = (G12 + G13) / 2

n(ii, Ntable) = (n2 + n3) / 2

d(ii, Ntable) = (D2 + d3) / 2

h(ii, Ntable) = (h2 + H3) / 2

ss(ii, Ntable) = (SS2 + ss3) / 2

Lastss(ii, Ntable) = (s2 + s3) / 2

aaa:

Next ii

Next j

Next i

Dim reVal() As MATRIX

ReDim reVal(UBound(GI, 2))

For i = 1 ToNtable

reVal(i).Cols = 8

reVal(i).Rows = NumAge

ReDim reVal(i).data(reVal(i).Rows, reVal(i).Cols)

For j = 1 To NumAge

reVal(i).data(j, 1) = GI(j, i)

reVal(i).data(j, 2) = n(j, i)

reVal(i).data(j, 3) = d(j, i)

reVal(i).data(j, 4) = h(j, i)

reVal(i).data(j, 5) = Lastss(j, i)

reVal(i).data(j, 6) = ss(j, i)

reVal(i).data(j, 7) = G0(j, i)

reVal(i).data(j, 8) = G1(j, i)

reVal(i).data(j, 0) = Val(AgeInfor(1)) + j - 1

Next j

Next i

LargestProductive_G = reVal

Exit Function

End Function

Function GIncrement(iniDat() As Variant, GrowthBasalAreaEquation As String, VarArray1() As String, ParArray1() As String, ParArray1Vaue() As Double, VarArray2() As String, ParArray2Vaue() As Double, S0 As Double, tt As Double, BaseD As Double, SdInfor() As Variant, Hname As String, Dmin As Double, Dmax As Double, err0 As Double, G1Method As Long, Efmethod As Long, SP As Double, n0 As Double, d1 As Double, h1 As Double, s1 As Double, G0 As Double, G1 As Double) As Double

On Err GoTo han2

Dim GI As Double, i As Long, TN1 As Long, TN2 As Long, Expression1 As String, sName As String

sName = SdInfor(0)

TN1 = InStr(1, GrowthBasalAreaEquation, "=")

TN2 = Len(GrowthBasalAreaEquation)

Expression1 = mid(GrowthBasalAreaEquation, TN1 + 1, TN2 - TN1)

G0 = NewGetG0(iniDat(), VarArray1(), ParArray1Vaue(), VarArray2(), ParArray2Vaue(), S0, BaseD, Hname, sName, Dmin, Dmax, err0, SP, n0)

If G1Method = 0 Then

G1 = NewGetG1_Express(iniDat(), GrowthBasalAreaEquation, ParArray1Vaue(), VarArray2(), ParArray2Vaue(), n0, tt, BaseD, d1, h1, s1)

Else

If Efmethod = 0 Then

G1 = NewGetG1_D(iniDat(), Expression1, ParArray1(), ParArray1Vaue(), VarArray2(), ParArray2Vaue(), n0, tt, BaseD, Hname, sName, Efmethod, Dmin, Dmax, err0, SP, d1, h1, s1)

Else

G1 = NewGetG1_S(iniDat(), Expression1, ParArray1(), ParArray1Vaue(), VarArray2(), ParArray2Vaue(), n0, tt, BaseD, Hname, sName, Efmethod, SdInfor, err0, SP, d1, h1, s1)

End If

End If

If G1 <> 0 Then

GI = G1 - G0

Else

GI = -1

End If

GIncrement = GI

Exit Function

End Function

Function NewGetG1_D(iniDat() As Variant, Expression1 As String, ParArray1() As String, ParArray1Vaue() As Double, VarArray2() As String, ParArray2Vaue() As Double, n0 As Double, tt As Double, BaseD As Double, Hname As String, sName As String, Efmethod As Long, Dmin As Double, Dmax As Double, err0 As Double, SP As Double, d1 As Double, h1 As Double, s1 As Double) As Double

On Error GoTo han2

Dim i As Long, j As Long, G1 As Double, x2() As Double

ReDim x2(UBound(iniDat, 1), UBound(VarArray2))

Dim t As Long

For i = 1 To UBound(VarArray2)

If UCase(VarArray2(i)) = UCase(iniDat(0, 1)) Then

For j = 1 To UBound(iniDat, 1)

x2(j, i) = iniDat(j, 1) '' L

Next j

End If

If UCase(VarArray2(i)) = UCase(iniDat(0, 2)) Then ''T

For j = 1 To UBound(iniDat, 1)

x2(j, i) = iniDat(j, 2) + tt

Next j

End If

Next i

Dim h() As Double

h = DllMaths(2, x2, ParArray2Vaue)

h1 = h(1, 1)

Dim ObjEquation As String, temp As String, TD() As Double, OriS() As String, NewS() As String

ReDim OriS(3 + UBound(ParArray1))

'OriS(1) = "S"

OriS(1) = sName

'OriS(2) = "H"

OriS(2) = Hname

OriS(3) = iniDat(0, 2) ''T

For i = 1 To UBound(ParArray1)

OriS(3 + i) = ParArray1(i)

Next i

ReDim NewS(3 + UBound(ParArray1))

temp = Trim("(" + Trim(Str(n0)) + "*(D/" + Trim(Str(BaseD)) + ")^1.605)")

NewS(1) = temp

NewS(2) = h1

NewS(3) = iniDat(1, 2) + tt

For i = 1 To UBound(ParArray1)

NewS(3 + i) = ParArray1Vaue(i)

Next i

Dim ObjExpress As String

ObjExpress = ""

ObjExpress = Replacevar1(Expression1, OriS, NewS) ''g(T1,S=N*(D1/20)^1.065,H1)

ObjEquation = Trim("3.1415926/40000*D^2*" + Trim(Str(n0)) + "-(" + ObjExpress) + ")"

TD = DichotomyMethod(ObjEquation, Dmin, Dmax, err0, SP, Efmethod, sName)

If UBound(TD) > 1 Then

d1 = 0

h1 = 0

s1 = 0

G1 = 0

NewGetG1_D = G1

Exit Function

ElseIf UBound(TD) = 1 Then

d1 = TD(1)

ElseIf UBound(TD) = 0 Then

d1 = 0

h1 = 0

s1 = 0

G1 = 0

NewGetG1_D = G1

Exit Function

End If

Dim x4() As Double

ReDim x4(1, 2) ''D,N

x4(1, 1) = d1

x4(1, 2) = n0

Dim s() As Double

Dim g() As Double

s = DllMaths(4, x4)

g = DllMaths(3, x4)

s1 = s(1, 1)

G1 = g(1, 1) / 10000

NewGetG1_D = G1

Exit Function

han2:

End Function

Function NewGetG1_S(iniDat() As Variant, Expression1 As String, ParArray1() As String, ParArray1Vaue() As Double, VarArray2() As String, ParArray2Vaue() As Double, n0 As Double, tt As Double, BaseD As Double, Hname As String, sName As String, Efmethod As Long, SdInfor() As Variant, err0 As Double, SP As Double, d1 As Double, h1 As Double, s1 As Double) As Double

On Error GoTo han2

Dim i As Long

Dim j As Long

Dim G1 As Double

Dim x2() As Double

ReDim x2(UBound(iniDat, 1), UBound(VarArray2))

Dim t As Long

For i = 1 To UBound(VarArray2)

If UCase(VarArray2(i)) = UCase(iniDat(0, 1)) Then

For j = 1 To UBound(iniDat, 1)

x2(j, i) = iniDat(j, 1) '' L

Next j

End If

If UCase(VarArray2(i)) = UCase(iniDat(0, 2)) Then ''T

For j = 1 To UBound(iniDat, 1)

x2(j, i) = iniDat(j, 2) + tt

Next j

End If

Next i

Dim h() As Double

h = DllMaths(2, x2, ParArray2Vaue)

h1 = h(1, 1)

Dim ObjEquation As String

Dim temp As String

Dim TD() As Double

Dim OriS() As String

Dim NewS() As String

ReDim OriS(2 + UBound(ParArray1))

OriS(1) = Hname ''H

OriS(2) = iniDat(0, 2) ''T

For i = 1 To UBound(ParArray1)

OriS(2 + i) = ParArray1(i)

Next i

ReDim NewS(2 + UBound(ParArray1))

NewS(1) = h1

NewS(2) = iniDat(1, 2) + tt

For i = 1 To UBound(ParArray1)

NewS(2 + i) = ParArray1Vaue(i)

Next i

Dim ObjExpress As String

ObjExpress = ""

ObjExpress = Replacevar1(Expression1, OriS, NewS) ''g(T1,S=N*(D1/20)^1.065,H1)

ObjEquation = Trim("3.1415926/40000*400*(" + Trim(sName) + "/" + Trim(Str(n0)) + ")^(2/1.605)*" + Trim(Str(n0)) + "-(" + ObjExpress + ")")

Dim Smin As Double

Dim Smax As Double

Dim err1 As Double

SP = 50

Smin = 30

Smax = SdInfor(2)

TD = DichotomyMethod(ObjEquation, Smin, Smax, err0, SP, Efmethod, sName)

If UBound(TD) > 1 Then

d1 = 0

h1 = 0

s1 = 0

G1 = 0

NewGetG1_S = G1

Exit Function

ElseIf UBound(TD) = 1 Then

s1 = TD(1)

ElseIf UBound(TD) = 0 Then

d1 = 0

h1 = 0

s1 = 0

G1 = 0

NewGetG1_S = G1

Exit Function

End If

Dim x4() As Double

ReDim x4(1, 2) ''D,N

d1 = 20 * (s1 / n0) ^ (1 / 1.605)

x4(1, 1) = d1

x4(1, 2) = n0

Dim s() As Double

Dim g() As Double

g = DllMaths(3, x4)

G1 = g(1, 1) / 10000

NewGetG1_S = G1

Exit Function

han2:

Err.Raise 10000, Err.Source&" /NewGetG1_S", Err.Description

End Function

Function DichotomyMethod(Equation As String, a As Double, b As Double, err0 As Double, SP As Double, Efmethod As Long, sName As String)

On Error GoTo han2

Dim Xa As Double

Dim Xb As Double

Dim Xc As Double

Dim YaAs Double

Dim Yb As Double

Dim Yc As Double

Dim Nroot As Long

Nroot = 0

Dim Root() As Double

ReDim Root(0)

Dim i As Long

Xa = a

Xb = a + SP

i = i

Do While Xb< b

Ya = Gety(Equation, Xa, Efmethod, sName)

If Ya = 0 Then

Nroot = Nroot + 1

ReDim Preserve Root(Nroot)

Root(Nroot) = Xa

'Exit Do

End If

Yb = Gety(Equation, Xb, Efmethod, sName)

If Yb = 0 Then

Nroot = Nroot + 1

ReDim Preserve Root(Nroot)

Root(Nroot) = Xb

Exit Do

End If

Xc = (Xa + Xb) / 2

Yc = Gety(Equation, Xc, Efmethod, sName)

If Yc = 0 Then

Nroot = Nroot + 1

ReDim Preserve Root(Nroot)

Root(Nroot) = Xc

Exit Do

End If

If Ya * Yb< 0 Then

''''2015.03.27

If Abs(Xa - Xb) < 0.0000000001 Then

Nroot = Nroot + 1

ReDim Preserve Root(Nroot)

Root(Nroot) = (Xa + Xb) / 2

Exit Do

End If

If Abs(Yc) > err0 Then

If Ya * Yc> 0 Then

Xa = Xc

'Ya = Yc

ElseIfYa * Yc< 0 Then

Xb = Xc

End If

Else

Nroot = Nroot + 1

ReDim Preserve Root(Nroot)

Root(Nroot) = (Xa + Xb) / 2

'Stop

Exit Do

End If

ElseIf Ya * Yb> 0 Then

Xa = Xb

Xb = Xa + SP

End If

Loop

DichotomyMethod = Root

Exit Function

End Function
